# Supplementary material
Source: PubMed Central journal article supplement (PMC3529934)

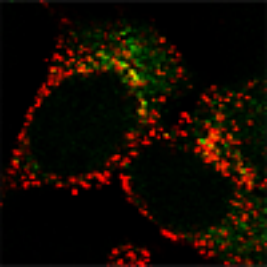

Supplement: NIHMS425440-supplement-4.pdf [file NIHMS425440-supplement-4.pdf]
